# Supplementary material for: Metabolic but not transcriptional regulation by PKM2 is important for natural killer cell responses
Source: eLife. 2020 Aug 19;9:e59166. doi: 10.7554/eLife.59166 (PMC7467725; doi:10.7554/eLife.59166)
Supplement: Supplementary file 1. — HiSeq RNA sequencing was then performed. Differential gene expression analysis was carried out using Partek to assess total gene changes between IL-2/12 stimulated Pkm2NK-WT and Pkm2NK-KO cells. Total gene changes were assessed at a fold change cut-off of 1.5 and a p value of 0.05 with an FDR of 0.05. [file elife-59166-supp1.xls]

## Sheet: DEG KO_2-12_18hr_vs wt_2-12_18h
Column ID	p-value(KO 2/12 18h vs. WT 2/12 18h)	FoldChange(KO 2/12 18h vs. WT 2/12 18h)	FoldChange(KO 2/12 18h vs. WT 2/12 18h) (Description)
Cd3g	7.13931e-07	-8.29281	KO 2/12 18h down vs WT 2/12 18h	Down regulated by two fold or greater
Dixdc1	1.59902e-07	-5.96441	KO 2/12 18h down vs WT 2/12 18h	Down regulated by two fold or greater
Nlrx1	5.5759e-08	-5.38266	KO 2/12 18h down vs WT 2/12 18h	Down regulated by two fold or greater
Slc37a4	8.25618e-11	-2.4342	KO 2/12 18h down vs WT 2/12 18h	Down regulated by two fold or greater
Pkm	8.8331e-12	-1.85463	KO 2/12 18h down vs WT 2/12 18h
Upk1a	1.25999e-06	-1.70048	KO 2/12 18h down vs WT 2/12 18h
Rnf26	8.38041e-07	-1.51495	KO 2/12 18h down vs WT 2/12 18h
Ptgis	1.88444e-05	1.5234	KO 2/12 18h up vs WT 2/12 18h
Jaml	2.70216e-09	1.67072	KO 2/12 18h up vs WT 2/12 18h
Rnf17	3.40586e-05	2.03486	KO 2/12 18h up vs WT 2/12 18h	Upregulated by two fold or greater
Cemip	3.20502e-05	2.92585	KO 2/12 18h up vs WT 2/12 18h	Upregulated by two fold or greater
