# Supplementary material for: Metabolic but not transcriptional regulation by PKM2 is important for natural killer cell responses
Source: eLife. 2020 Aug 19;9:e59166. doi: 10.7554/eLife.59166 (PMC7467725; doi:10.7554/eLife.59166)
Supplement: Supplementary file 2. — HiSeq RNA sequencing was then performed. Differential gene expression analysis was carried out using Partek to assess total gene changes between IL-2/12 TEPP-46 (50 μM) and IL-2/12 Vehicle (0.1% v/v DMSO). Total gene changes were assessed at a fold change cut-off of 1.5 and a p value of 0.05 with FDR 0.05. [file elife-59166-supp2.xlsx]

## Sheet: DEG 2_12 Tepp vs. 2_12 Veh FC 1
Gene Symbol	p-value(2/12 Tepp vs. 2/12 Veh)	FoldChange(2/12 Tepp vs. 2/12 Veh)	FoldChange(2/12 Tepp vs. 2/12 Veh) (Description)
Alpl	5.63802e-05	-2.8801	2/12 Tepp down vs 2/12 Veh	Down regulated by two fold or greater
Tnnt1	4.5931e-06	-2.27352	2/12 Tepp down vs 2/12 Veh	Down regulated by two fold or greater
Lipg	3.57814e-05	-2.19855	2/12 Tepp down vs 2/12 Veh	Down regulated by two fold or greater
Arfgef3	2.19356e-13	-2.08863	2/12 Tepp down vs 2/12 Veh	Down regulated by two fold or greater
Fcrl1	4.22089e-07	-1.94392	2/12 Tepp down vs 2/12 Veh
Dnph1	5.82823e-05	-1.85164	2/12 Tepp down vs 2/12 Veh
Afp	2.0602e-07	-1.63954	2/12 Tepp down vs 2/12 Veh
Immp2l	2.79035e-07	-1.63918	2/12 Tepp down vs 2/12 Veh
Gm5088	0.00012887	-1.59369	2/12 Tepp down vs 2/12 Veh
Aebp1	1.1006e-05	-1.58324	2/12 Tepp down vs 2/12 Veh
Rian	7.97249e-06	-1.56678	2/12 Tepp down vs 2/12 Veh
Cdc42bpb	3.4263e-05	-1.53052	2/12 Tepp down vs 2/12 Veh
F2rl3	0.000169481	-1.51922	2/12 Tepp down vs 2/12 Veh
Slc30a1	4.71225e-06	1.62499	2/12 Tepp up vs 2/12 Veh
Glis3	8.09561e-06	1.69475	2/12 Tepp up vs 2/12 Veh
Sult2b1	0.000350437	1.74682	2/12 Tepp up vs 2/12 Veh
Unc5c	3.00859e-06	1.78773	2/12 Tepp up vs 2/12 Veh
Tgfa	0.000372578	1.9844	2/12 Tepp up vs 2/12 Veh
Mt1	1.26835e-15	2.13312	2/12 Tepp up vs 2/12 Veh
Dmc1	3.22354e-05	2.16499	2/12 Tepp up vs 2/12 Veh	Upregulated by two fold or greater
Gzmd	8.60021e-05	2.18185	2/12 Tepp up vs 2/12 Veh	Upregulated by two fold or greater
Gzme	2.1768e-05	2.20505	2/12 Tepp up vs 2/12 Veh	Upregulated by two fold or greater
Mt2	2.08644e-14	2.665	2/12 Tepp up vs 2/12 Veh	Upregulated by two fold or greater
Gzmf	0.000218923	3.14809	2/12 Tepp up vs 2/12 Veh	Upregulated by two fold or greater
