# Supplementary figures and images for: Metabolic but not transcriptional regulation by PKM2 is important for natural killer cell responses
Source: eLife journal article supplement (doi:10.7554/elife.59166), 2020-08-19

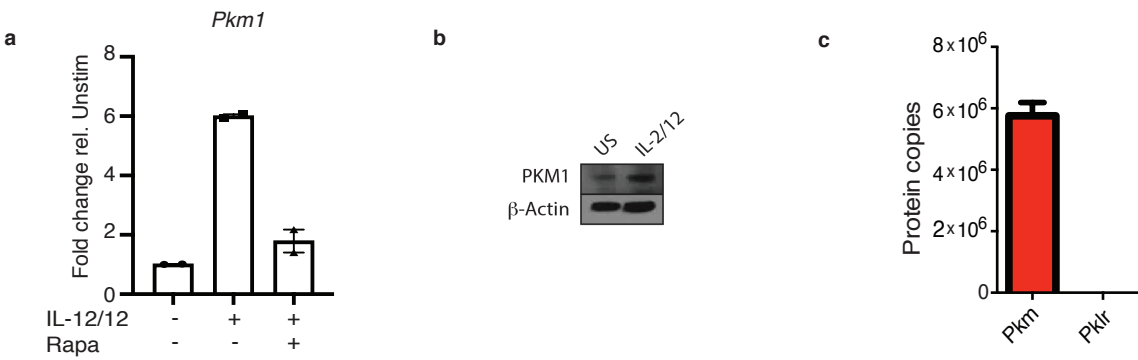

Supplement: supp [file elife_poa_e59166_'Figure_1_figure_supplement_1.pdf › elife_poa_e59166_'Figure_1_figure_supplement_1.pdf]

Supplemental Figure 2

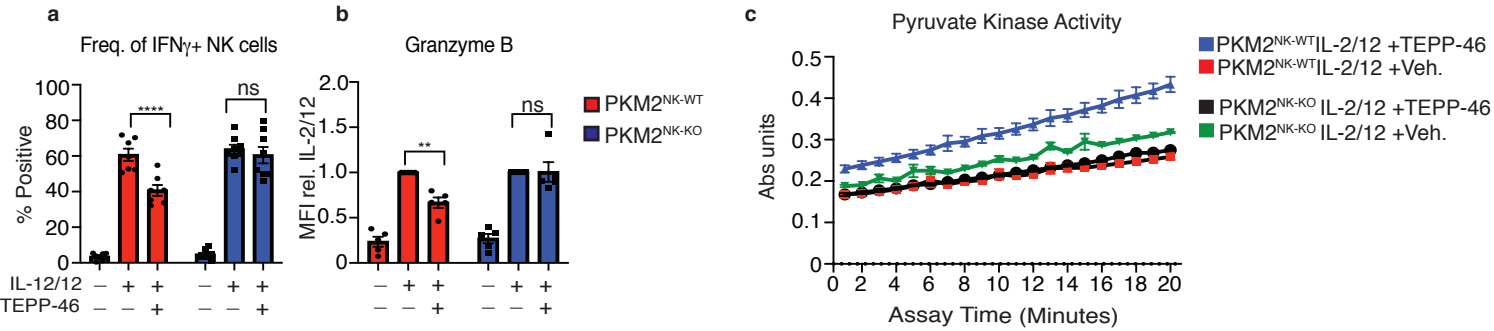

Supplement: supp [file elife_poa_e59166_Figure_6_figure_supplement_1.pdf › elife_poa_e59166_Figure_6_figure_supplement_1.pdf]

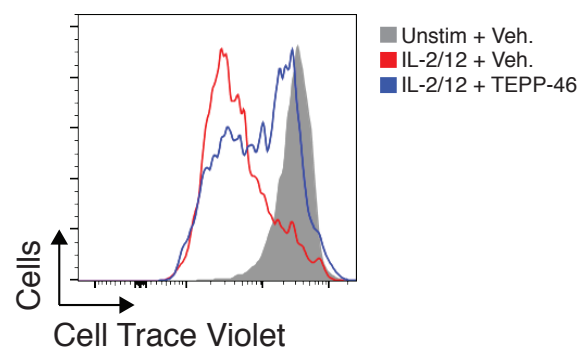

Supplement: supp [file elife_poa_e59166_Figure_7_figure_supplement_1.pdf › elife_poa_e59166_Figure_7_figure_supplement_1.pdf]
